# Supplementary material
Source: publisher figshare collection journal article supplement (https://sage.figshare.com/ndownloader/files/14375573)
Supplement: Supplementary file 1 [file 14375573]

## Supplementary material: Narrative tasks

### Task 1: Preparing a gift for a Chinese wedding

Look at these pictures. Tell me how **Xiao Hong** (小红) prepares the gift for her friends' **Chinese wedding**. You have three minutes to prepare. You may not write down anything while preparing.

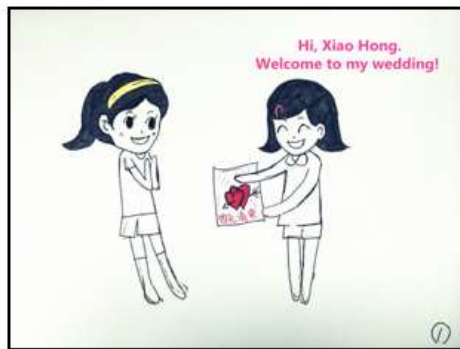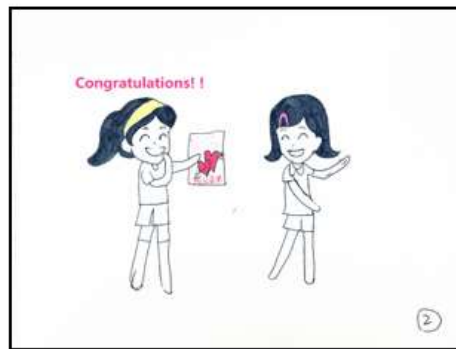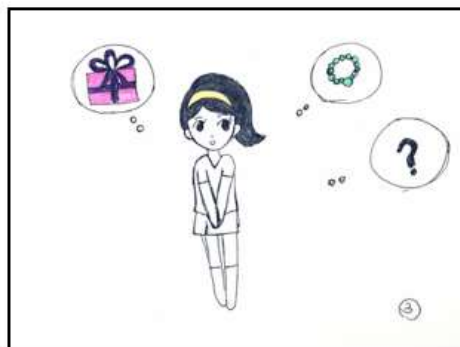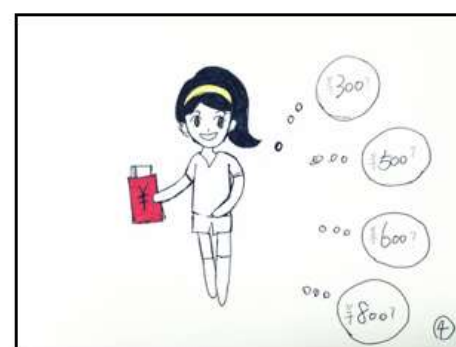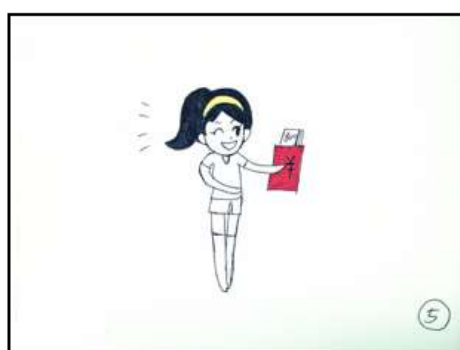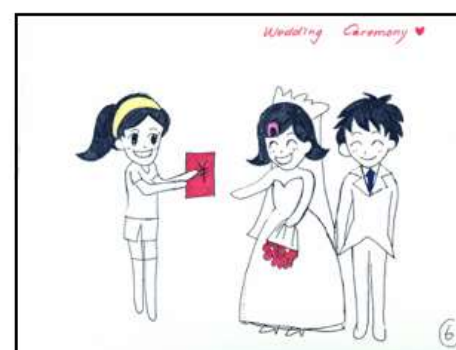

## Task 2: Preparing a gift for a Western wedding

Look at these pictures. Tell me how **Lucy** prepares the gift for her friends' **Western wedding**. You have three minutes to prepare. You may not write down anything while preparing.

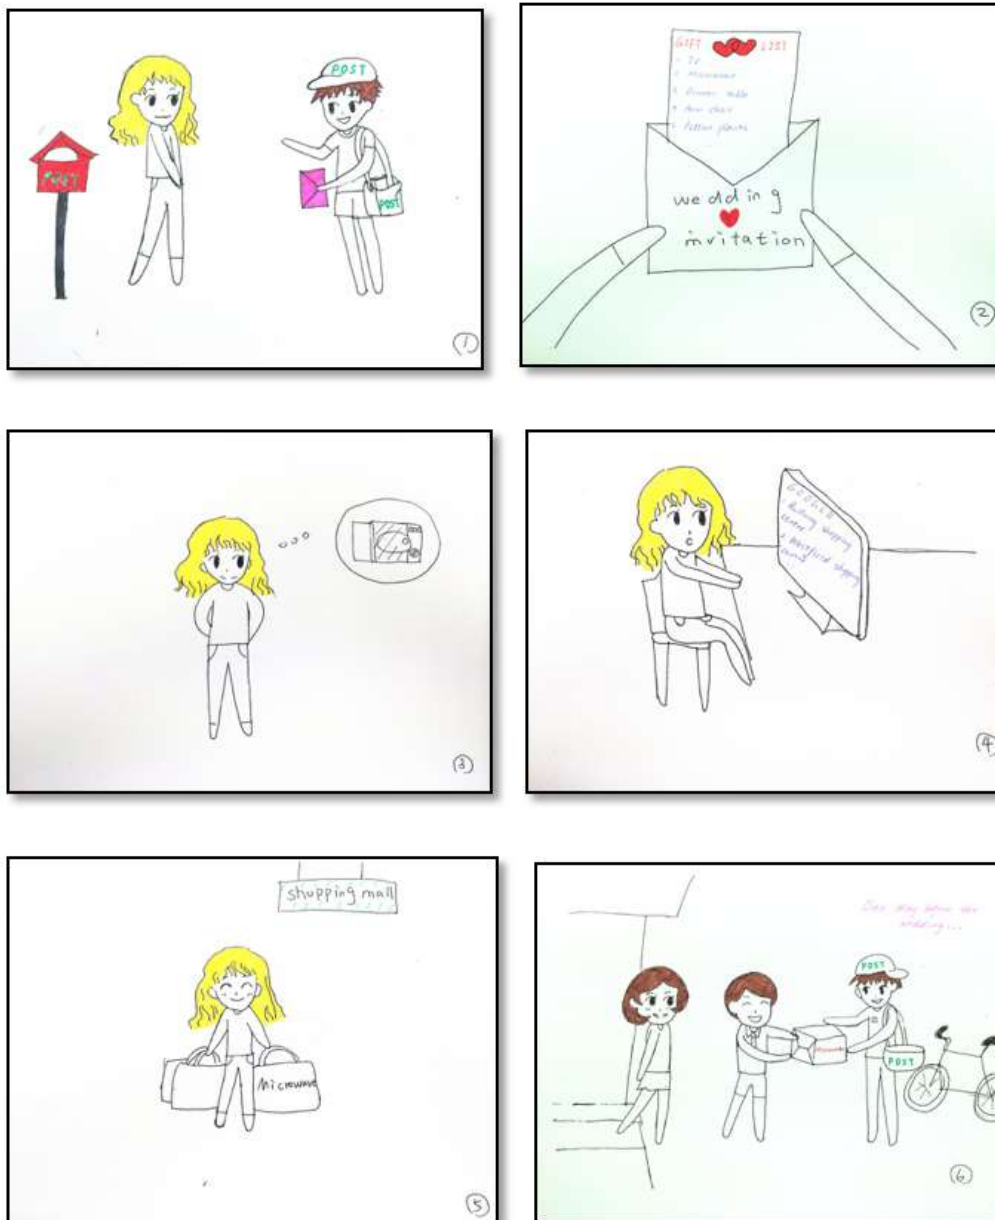

## Task 3: Finding the lost thing(s)

Think about **your** experience of finding a/some lost thing(s). Tell me how you found the thing(s). You have three minutes to prepare. You may not write down anything while preparing.

## Task 4: Planning to find a job

Think about **your** plan for finding a job when you graduate. You have three minutes to prepare. You may not write down anything while preparing.

## Supplementary material: Coding scheme used in the present study

| Attention orientation        | Definition (Follow Fukuta's (2016) definitions)                                                                  | Performance                                                                         | Retrospective comment                                                                                                                                                             |
|------------------------------|------------------------------------------------------------------------------------------------------------------|-------------------------------------------------------------------------------------|-----------------------------------------------------------------------------------------------------------------------------------------------------------------------------------|
| <i>Conceptualising</i>       | Neither the choice of lexis, syntax, nor phonetic representation, but how to convey the information as intended. | "She prepared eight hundred yuan. Hmm in China, eight is a uh special symbol."      | "Number eight reminded me of the Chinese culture. Eight means fortune and luck. There must be some implications. So, I decided to relate the number eight to the Chinese custom." |
| <i>Lexical choice</i>        | Episodes related to lexis or lexicalised phrases.                                                                | "I will show the interviewer..."                                                    | "I intended to mention I would should my determination to the interviewer. But I didn't remember the word, determination, so I paused for a long time."                           |
| <i>Syntactic encoding</i>    | Episodes related to the word order and sentence structures, including morphosyntactic processing.                | "Lucy found a shopping mall online. Uh...She bought a microwave in her spare time." | "I had a long paused because I was struggling how to combine the two sentences into one complete sentence."                                                                       |
| <i>Phonological encoding</i> | Episodes related to the phonological features in their production.                                               | "One day, a man saw a cherry bros...cherry blossoms." (Fukuta, 2016)                | "I was confused whether it is 'blossoms' or 'brossoms' as the appropriate pronunciation." (Fukuta, 2016)                                                                          |
| <i>Grammatical encoding</i>  | Episodes related to the grammatical features in their production.                                                | "I lost I lose...I lost...I lose lose..."                                           | "I was struggling with the tense. I used the past tense at the beginning. Then, I changed to the present tense. I was unsure which one is correct."                               |
